# Supplementary material for: Study of the Combination of Self-Activating Photodynamic Therapy and Chemotherapy for Cancer Treatment
Source: Biomolecules. 2019 Aug 20;9(8):384. doi: 10.3390/biom9080384 (PMC6722738; doi:10.3390/biom9080384)
Supplement: Supplementary file 1 [file biomolecules-09-00384-s001.pdf]

## Supplementary material

### Steps to Clz - 3

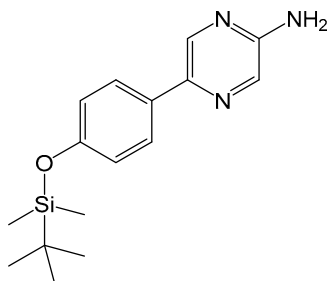

5-(4-((*tert*-butyldimethylsilyl)oxy)phenyl)pyrazin-2-amine

2-amino-5-bromopyrazine (0.13g, 0.79 mmol) and 4-(*tert*-butyldimethylsilyloxy)phenylboronic acid (0.3g, 1.19 mmol) were dissolved in toluene (3mL) and stirred at room temperature. Ethanol (0.6 mL) and 1 M Na<sub>2</sub>CO<sub>3</sub> aq. (1.2 mL) were added to the reaction mixture. After vacuum deaeration and argon gas protection, bis-(triphenylphosphine) palladium (II) chloride (5.5% of 2-amino-5-bromopyrazine) in 0.5 mL of toluene was added to the solution, and the mixture was deaerated again and stirred for 2 hours at 105 °C under argon atmosphere. The progress of the reaction was monitored by TLC. After cooling to room temperature, the solution was filtered through a Celite pad to remove the palladium catalyst. The solution was extracted with ethyl acetate, and the brown organic phase was washed with water and brine, dried over Na<sub>2</sub>SO<sub>4</sub> and evaporated. The resulting residue was purified by silica gel column chromatography using hexane /ethyl acetate 2/1, v/v, affording 223 mg (93%) as a yellow solid. R<sub>f</sub>: 0.20. <sup>1</sup>H-RMN (CDCl<sub>3</sub>, 400 MHz) δ ppm: 8.39 (d, 1H), 8.03 (d, 1H), 7.74 (d, 2H), 6.91 (d, 2H), 4.61 (s, 2H), 1.00 (s, 9H), 0.22 (s, 6H).

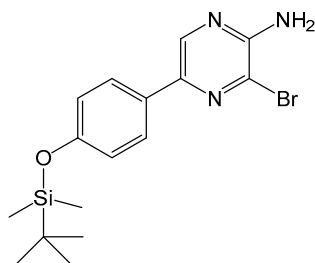

3-bromo-5-(4-((*tert*-butyldimethylsilyl)oxy)phenyl)pyrazin-2-amine

To a cooled solution of 5-(4-((*tert*-butyldimethylsilyl)oxy)phenyl)pyrazin-2-amine (0.1 g, 0.33 mmol) in DMF (1 mL) N-Bromosuccinimide (0.059 g, 0.33 mmol) was added in apporportion at 0°C and the resulting mixture was stirred at r.t for 2 h. The reaction solution was washed with water and extracted with ethyl acetate. The organic layer was dried over

Na<sub>2</sub>SO<sub>4</sub> anhydrous, filtered and the solvent was removed under reduced pressure. The crude product thus obtained was purified using silica gel column chromatography (hexane/EtOAc = 5:1). Yield: 63 mg (50%). R<sub>f</sub>: 0.46. <sup>1</sup>H-RMN (CDCl<sub>3</sub>, 400 MHz) δ ppm: 8.33 (s, 1H), 7.74 (d, 2H), 6.90 (d, 2H), 4.99 (s, 2H), 0.99 (s, 9H), 0.22 (s, 6H).

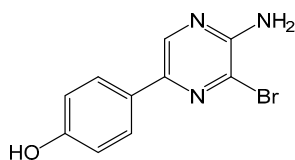

4-(5-amino-6-bromopyrazin-2-yl)phenol

3-bromo-5-(4-((tert-butyldimethylsilyl)oxy)phenyl)pyrazin-2-amine (protected compound) was dissolved in THF at 0°C and TBAF was added dropwise into the solution and the mixture was stirred for 10 minutes. Then, the reaction mixture stirred at r.t for 3 hours. After that, the solution was poured into water extracted with ethyl acetate, and dried over Na<sub>2</sub>SO<sub>4</sub> anhydrous. The residue was purified by acid-base extraction affording 4-(5-amino-6-bromopyrazin-2-yl)phenol as the deprotected compound. Yield: 26 mg (62%). <sup>1</sup>H-RMN (CDCl<sub>3</sub>, 400 MHz) δ ppm: 8.32 (s, 1H), 7.76 (d, 2H), 6.90 (d, 2H), 5.07 (s, 2H).

## Steps to Clz - 2

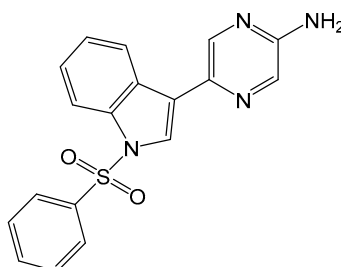

5-(1-(phenylsulfonyl)-1H-indol-3-yl)pyrazin-2-amine

2-amino-5-bromopyrazine (0.23g, 1.32 mmol) and 1-(phenylsulfonyl)-3-indolylboronic acid (0.3 g, 1.19 mmol) were dissolved in toluene (7mL) and stirred at room temperature. Ethanol (2.3 mL) and 1 M Na<sub>2</sub>CO<sub>3</sub> aq. (2 mL) were added to the reaction mixture. After vacuum deaeration and argon gas protection, bis-(triphenylphosphine) palladium (II) chloride (5.5% of 2-amino-5-bromopyrazine) in 0.5 mL of toluene was added to the solution, and the mixture was deaerated again and stirred for 2 hours at 110 °C under argon atmosphere. The progress of the reaction was monitored by TLC. After cooling to room temperature, the solution was filtered through a Celite pad to remove the palladium catalyst. The solution was extracted with ethyl acetate, and the brown organic phase was washed with water and brine, dried over Na<sub>2</sub>SO<sub>4</sub> and evaporated. The resulting residue was purified by silica gel column chromatography using hexane /ethyl acetate 2/1, v/v, affording 330 mg (72%) as a green solid. R<sub>f</sub>: 0.18. <sup>1</sup>H-RMN (CDCl<sub>3</sub>, 400 MHz) δ ppm: 8.43 (d, 1H), 8.15 (d, 1H), 8.08 (d, 1H), 8.05 (d, 1H), 7.96 (s, 1H), 7.93 (d, 2H), 7.54 (t, 1H), 7.44 (t, 2H), 7.34 (m, 2H), 4.62 (bs, 2H).

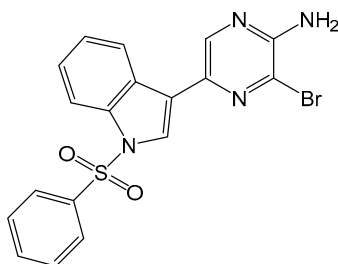

3-bromo-5-(1-(phenylsulfonyl)-1H-indol-3-yl)pyrazin-2-amine

To a cooled solution of 5-(1-(phenylsulfonyl)-1H-indol-3-yl)pyrazin-2-amine (0.1 g, 0.31 mmol) in DMF (1 mL) N-Bromosuccinimide (0.056 g, 0.31 mmol) was added in apporportion at 0°C and the resulting mixture was stirred at r.t for 2 h. The reaction solution was washed with water and extracted with ethyl acetate. The organic layer was dried over Na<sub>2</sub>SO<sub>4</sub> anhydrous, filtered and the solvent was removed under reduced pressure. The crude product thus obtained was purified using silica gel column chromatography (hexane/EtOAc = 3:1) as a yellow solid (121 mg, 60 %). R<sub>f</sub>: 0.31. <sup>1</sup>H-RMN (CDCl<sub>3</sub>, 400 MHz) δ ppm: 8.37 (s, 1H), 8.15 (d, 1H), 8.03 (d, 1H), 7.96 (s, 1H), 7.92 (d, 2H), 7.55 (t, 1H), 7.45 (t, 2H), 7.36 (m, 2H), 5.14 (bs, 2H).

### Steps to Clz - 1 = Clz - 2

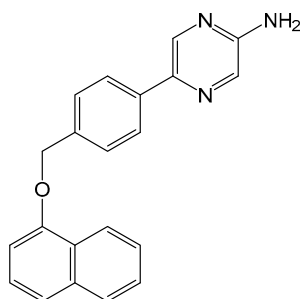**2-amino-5-bromopyrazine (0.2 g, 1.3 mmol).**

Purified by silica gel column chromatography using hexane /ethyl acetate 1/1, v/v.

Yield: 342.1 mg (91 %). R<sub>f</sub>: 0.36. <sup>1</sup>H-RMN (CDCl<sub>3</sub>, 400 MHz) δ ppm: 8.49 (d, 1H), 8.36 (dd, 1H), 8.06 (d, 1H), 7.93 (dd, 2H), 7.81 (dd, 1H), 7.62 (dd, 2H), 7.49 (t, 2H), 7.44 (d, 1H), 7.38 (d, 1H), 6.91 (d, 1H), 5.31 (s, 2H), 4.60 (s, 2H).

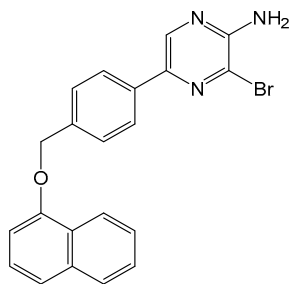

(0.2 g, 1.3 mmol). Purified by silica gel column chromatography using hexane /ethyl acetate 1/1, v/v.

Yield: 113.9 mg (46 %). R<sub>f</sub>: 0.36. <sup>1</sup>H-RMN (CDCl<sub>3</sub>, 400 MHz) δ ppm: 8.43 (s, 1H), 8.37 (d, 1H), 8.18 (d, 1H), 7.90 (dd, 2H), 7.65 (dd, 2H), 7.64 (t, 1H), 7.59 (s, 1H), 7.57 (s, 1H), 7.54 (t, 1H), 6.76 (d, 1H), 5.30 (s, 2H), 5.06 (s, 2H).
